# Supplementary material
Source: publisher figshare collection journal article supplement (https://acs.figshare.com/ndownloader/files/24550596)
Supplement: Supplementary file 1 [file 24550596]

# Supporting Information

## Simple Approach: Heat Treatment to Improve the Electrochemical Performance of Commonly Used Anode Electrodes for Lithium-Ion Batteries

*Ye Jin, Han Yu, Xinhua Liang \**

Department of Chemical and Biochemical Engineering, Missouri University of Science and  
Technology, Rolla, Missouri 65409, United States

\* Corresponding author. E-mail: [liangxin@mst.edu](mailto:liangxin@mst.edu)

The following additional information is listed in this Supporting Information file, including Table S1, density data of the materials in electrodes; Table S2, weight percentages of F element of the electrodes; Table S3, electrochemical impedance spectra fitting results of electrodes; Table S4, binding energies and atomic concentrations of all cycled electrodes; Figure S1, FTIR spectra of PVDF before and after heat treatment and the TGA curve of PVDF; Figure S2, SEM images of pure active material powders or flakes; Figure S3, SEM images of fresh LTO electrodes with and without heat treatment; Figure S4, porosity and liquid electrolyte uptake of the electrodes with and without heat treatment; Figure S5, SEM image and EDS mapping of the cross-section area of the graphite electrodes; Figure S6, XPS survey spectra of all fresh electrodes; Figure S7, Nyquist plots of the electrodes; Figure S8, cycling performance of LTO and  $\text{TiO}_2$  within 1.0- 3.0 V; Figure S9, CV curves of electrodes at different scan rates; Figure S10, XPS survey spectra of the cycled electrodes; Figure S11, SEM images of fresh LTO electrode without heat treatment; Figure S12, SEM image and EDS mapping of pristine LTO electrode after 500 cycles of charge/discharge; Figure S13, SEM images of fresh  $\text{TiO}_2$  electrode with heat treatment; Figure S14, SEM image and EDS mapping of pristine graphite electrode after 500 cycles of charge/discharge; Figure S15, TEM images of pure  $\text{TiO}_2$  nanoparticles.

**Table S1.** Density data of the materials in electrodes.

|                     |                  | Density (g cm <sup>-3</sup> ) |
|---------------------|------------------|-------------------------------|
| Binder              | PVDF             | 1.76                          |
| Conductive material | Carbon black     | 1.70                          |
|                     | TiO <sub>2</sub> | 3.78                          |
| Active materials    | LTO              | 3.50                          |
|                     | Graphite         | 2.21                          |

**Table S2.** Weight percentages of F element of the electrodes obtained from EDS spectra and XPS analysis.

| Electrodes       |                | F element (wt. %) |              |
|------------------|----------------|-------------------|--------------|
|                  |                | EDS spectrum      | XPS analysis |
| LTO              | Pristine       | 4.4               | 3.4          |
|                  | 250 °C treated | 4.0               | 1.8          |
| TiO <sub>2</sub> | Pristine       | 4.8               | 3.5          |
|                  | 250 °C treated | 4.6               | 3.1          |
| Graphite         | Pristine       | -                 | 2.5          |
|                  | 250 °C treated | -                 | 2.4          |

**Table S3.** Electrochemical impedance spectra fitting results of electrodes after 1 C cycling performance test.

| Electrodes       |                | After formation    |                      |                     |                      | After long-term cycling |                      |                     |                      |
|------------------|----------------|--------------------|----------------------|---------------------|----------------------|-------------------------|----------------------|---------------------|----------------------|
|                  |                | R <sub>f</sub> (Ω) | R <sub>SEI</sub> (Ω) | R <sub>ct</sub> (Ω) | R <sub>tot</sub> (Ω) | R <sub>f</sub> (Ω)      | R <sub>SEI</sub> (Ω) | R <sub>ct</sub> (Ω) | R <sub>tot</sub> (Ω) |
| LTO              | Pristine       | 8.6                | 39.6                 | 164.6               | 212.8                | 20.1                    | 183.6                | 492.9               | 696.6                |
|                  | 250 °C treated | 6.0                | 55.2                 | 101.2               | 162.4                | 25.2                    | 103.4                | 290.1               | 418.7                |
| TiO <sub>2</sub> | Pristine       | 11.9               | 10.4                 | 73.6                | 95.8                 | 19.2                    | 45.3                 | 41.2                | 105.7                |
|                  | 250 °C treated | 9.3                | 22.1                 | 44.6                | 75.9                 | 17.6                    | 37.5                 | 34.2                | 89.2                 |
| Graphite         | Pristine       | 15.1               | 18.0                 | 56.0                | 89.1                 | 28.8                    | 23.1                 | 76.9                | 128.8                |
|                  | 250 °C treated | 19.8               | 27.2                 | 38.0                | 85.0                 | 29.6                    | 30.1                 | 55.4                | 115.2                |

**Table S4.** Binding energies (BE) and atomic concentrations (at.%) of three anode materials with and without 250 °C treatment, identified by XPS at the surface of the electrodes.

| Anode Material   | Orbital | Pristine |      | 250 °C treated |       | Assignment                       |
|------------------|---------|----------|------|----------------|-------|----------------------------------|
|                  |         | BE (eV)  | at % | BE (eV)        | at %  |                                  |
| LTO              | F 1s    | 684.4    | 42.8 | 684.3          | 56.0  | LiF                              |
|                  |         | 686.8    | 45.5 | 686.6          | 44.0  | LiPF <sub>y</sub> O <sub>z</sub> |
|                  |         | 687.8    | 11.7 |                |       | PVDF                             |
|                  | C 1s    | 284.8    | 32.7 | 284.7          | 47.4  | C-C                              |
|                  |         | 286.4    | 7.4  | 286.4          | 13.3  | CH <sub>2</sub>                  |
|                  |         |          |      | 288.6          | 4.3   | Li <sub>2</sub> CO <sub>3</sub>  |
|                  | O 1s    | 289.9    | 60.0 | 289.7          | 35.1  | CF <sub>2</sub>                  |
|                  |         | 528.0    | 3.5  | 527.9          | 2.8   | Ti-O from LTO                    |
|                  |         | 529.6    | 3.5  | 529.9          | 8.1   | ROLi                             |
|                  |         | 531.5    | 93.0 | 531.4          | 89.1  | C=O                              |
|                  |         |          |      |                |       |                                  |
| TiO <sub>2</sub> | F 1s    | 684.1    | 58.3 | 684.2          | 100.0 | LiF                              |
|                  |         | 686.7    | 19.2 |                |       | LiPF <sub>y</sub> O <sub>z</sub> |
|                  |         | 688.1    | 22.5 |                |       | PVDF                             |
|                  | C 1s    | 282.7    | 6.6  | 282.7          | 1.2   | Ti-C                             |
|                  |         | 284.9    | 45.0 | 284.7          | 55.6  | C-C                              |
|                  |         | 286.4    | 18.5 | 286.2          | 18.6  | CH <sub>2</sub>                  |
|                  | O 1s    |          |      | 288.7          | 12.4  | Li <sub>2</sub> CO <sub>3</sub>  |
|                  |         | 290.1    | 30.0 | 290.3          | 12.1  | CF <sub>2</sub>                  |
|                  |         | 528.6    | 33.7 | 528.3          | 17.1  | Ti-O from TiO <sub>2</sub>       |
|                  |         | 530.5    | 8.8  |                |       | ROLi                             |
|                  |         | 532.0    | 57.5 | 531.4          | 82.9  | C=O                              |
| Graphite         | F 1s    | 683.7    | 33.4 | 684.1          | 59.2  | LiF                              |
|                  |         | 686.1    | 52.4 | 686.4          | 40.8  | LiPF <sub>y</sub> O <sub>z</sub> |
|                  |         | 687.0    | 14.2 |                |       | PVDF                             |
|                  | C 1s    | 284.8    | 44.9 | 284.8          | 35.8  | C-C                              |
|                  |         | 286.4    | 21.4 | 286.4          | 16.5  | CH <sub>2</sub>                  |
|                  |         |          |      | 288.4          | 7.7   | Li <sub>2</sub> CO <sub>3</sub>  |
|                  | O 1s    | 289.7    | 33.6 | 289.8          | 40.0  | CF <sub>2</sub>                  |
|                  |         |          |      | 527.8          | 19.8  | Li-O                             |
|                  |         | 529.7    | 15.7 | 529.3          | 3.1   | ROLi                             |
|                  |         | 530.9    | 84.3 | 531.0          | 77.1  | C=O                              |
|                  |         |          |      |                |       |                                  |

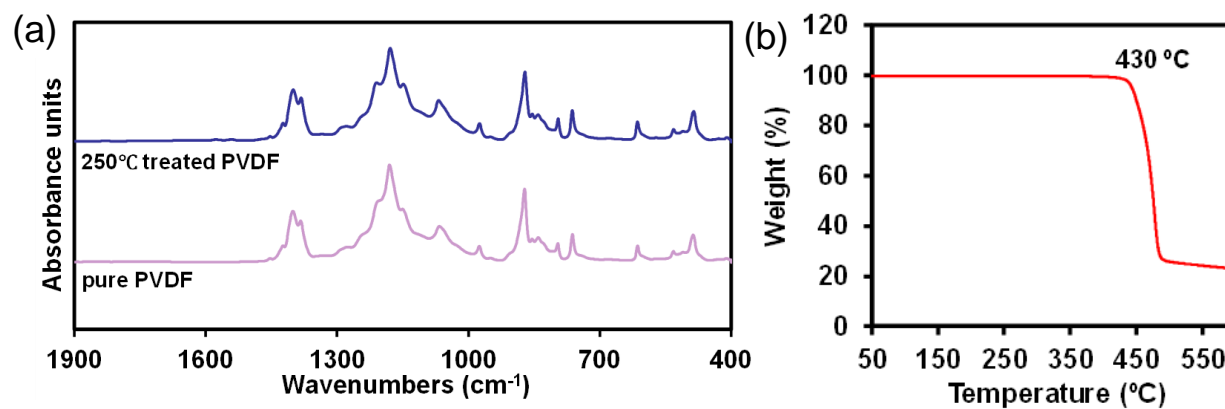

**Figure S1.** (a) FTIR spectra of PVDF before and after 250  $^{\circ}\text{C}$  treatment, and (b) TGA curve of the PVDF used in this study.

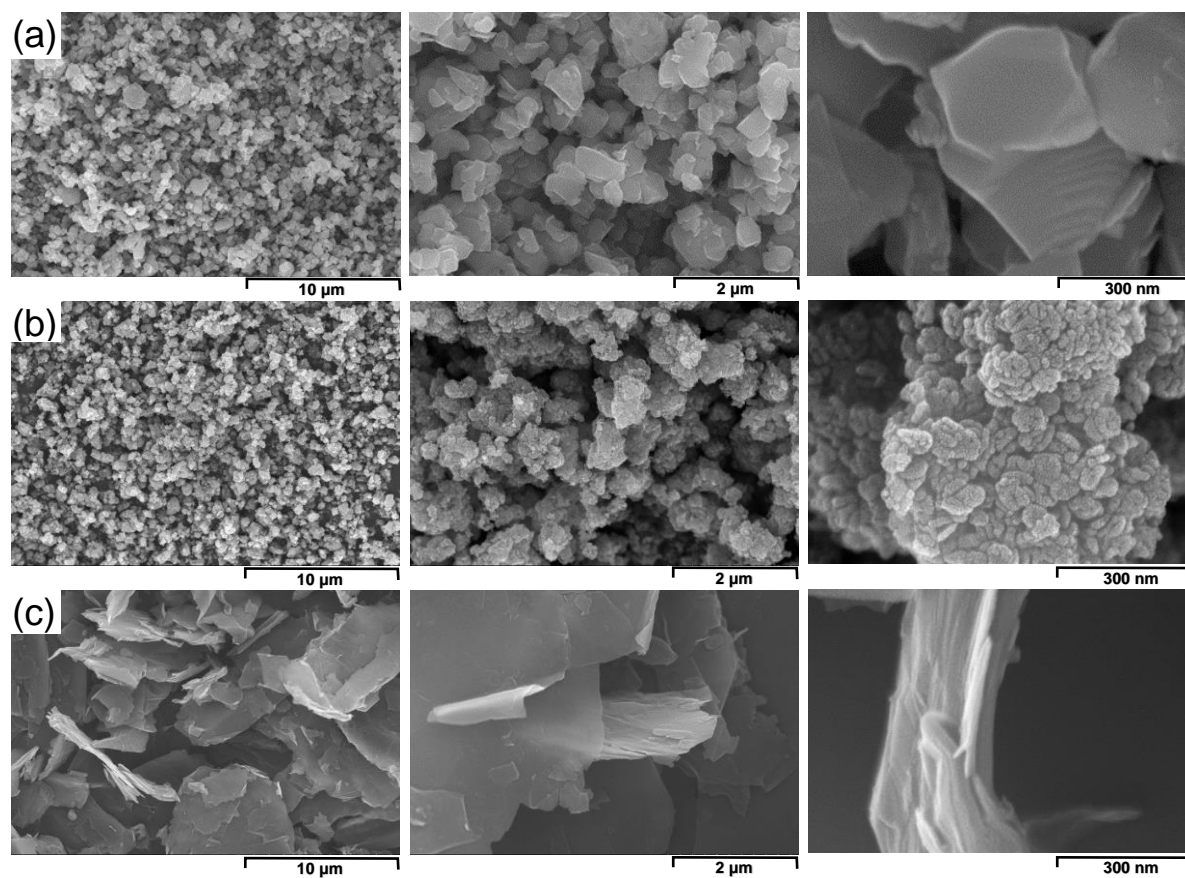

**Figure S2.** SEM images of (a) LTO powders, (b)  $\text{TiO}_2$  powders, and (c) graphite flakes.

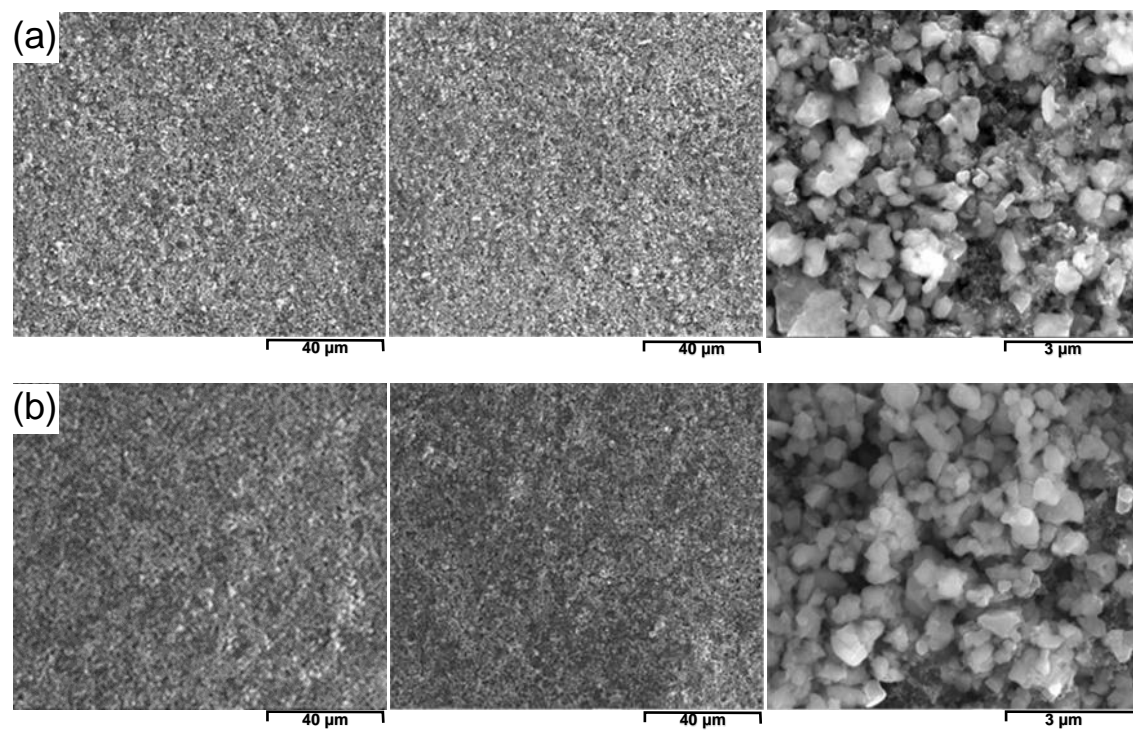

**Figure S3.** SEM images of fresh LTO electrodes (a) before and (b) after 250 °C heat treatment.

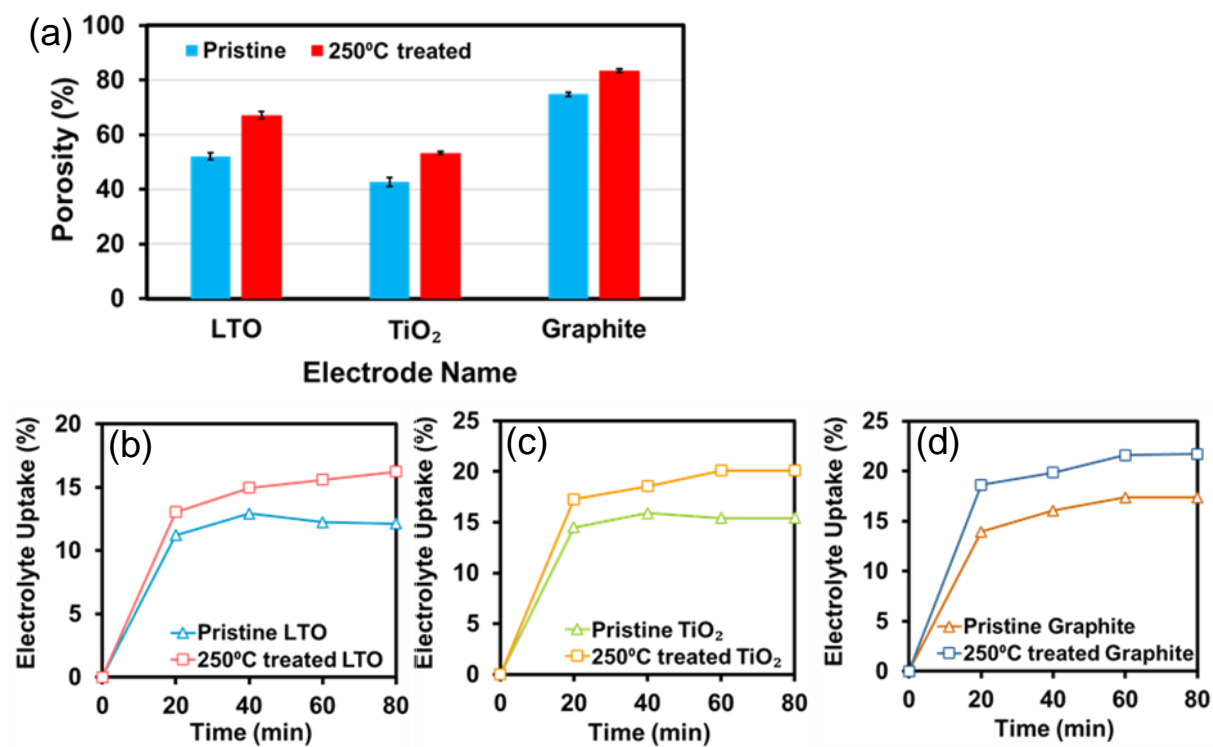

**Figure S4.** (a) Porosity of LTO, TiO<sub>2</sub>, and graphite electrodes before and after 250 °C treatment. Liquid electrolyte weight uptake vs. time for pristine and 250 °C treated electrodes: (b) LTO, (c) TiO<sub>2</sub>, and (d) graphite.

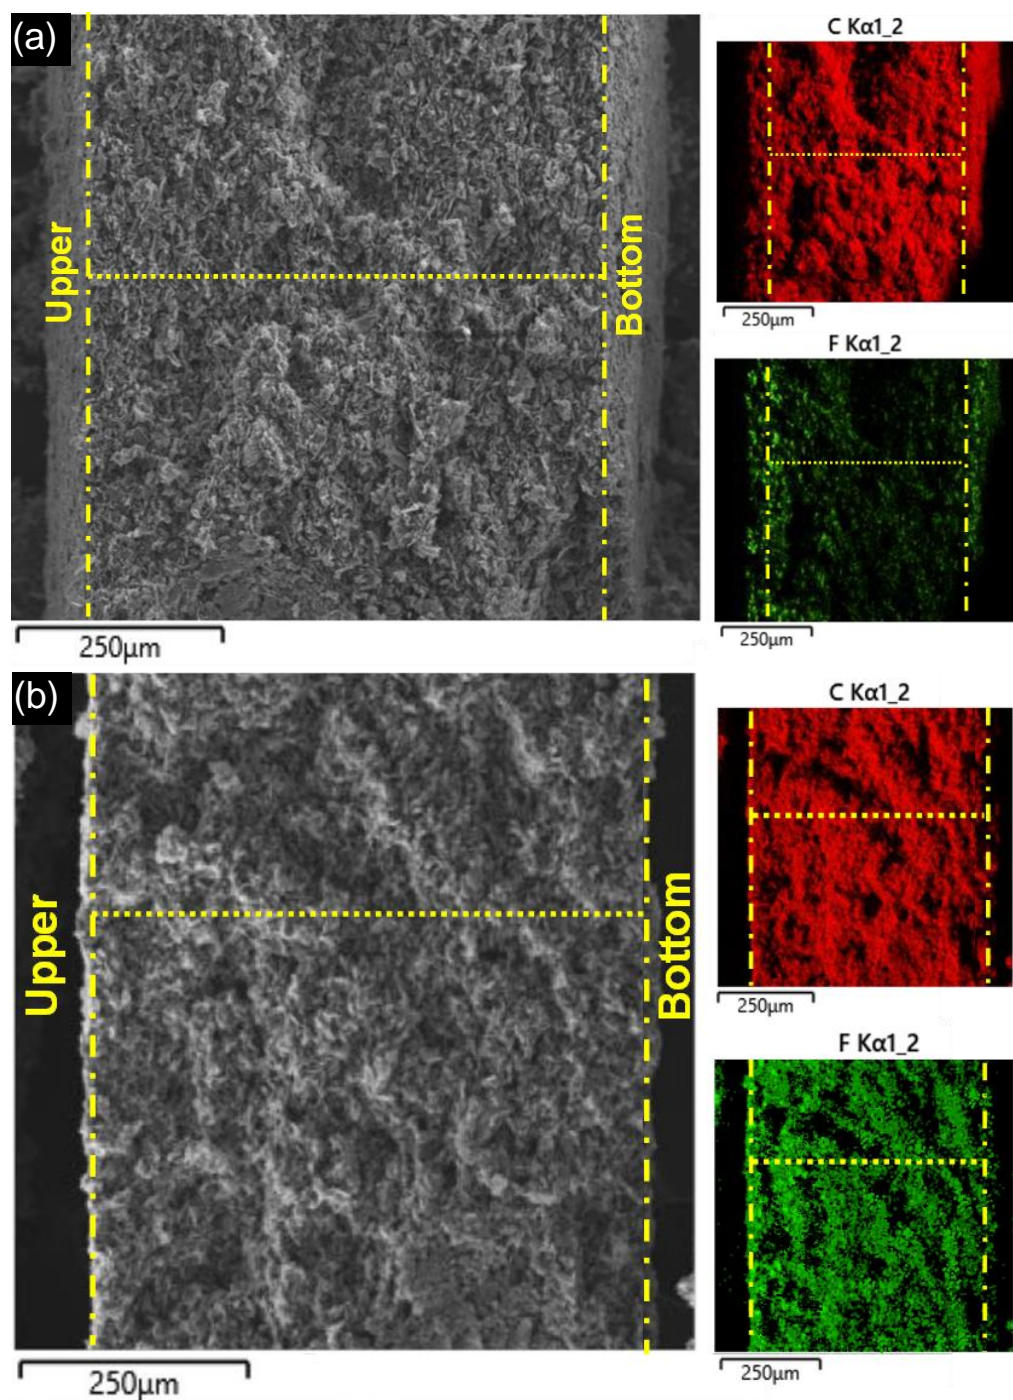

**Figure S5.** SEM images and EDS mapping of the cross-sectional area of (a) pristine graphite electrode and (b) 250 °C treated graphite electrode.



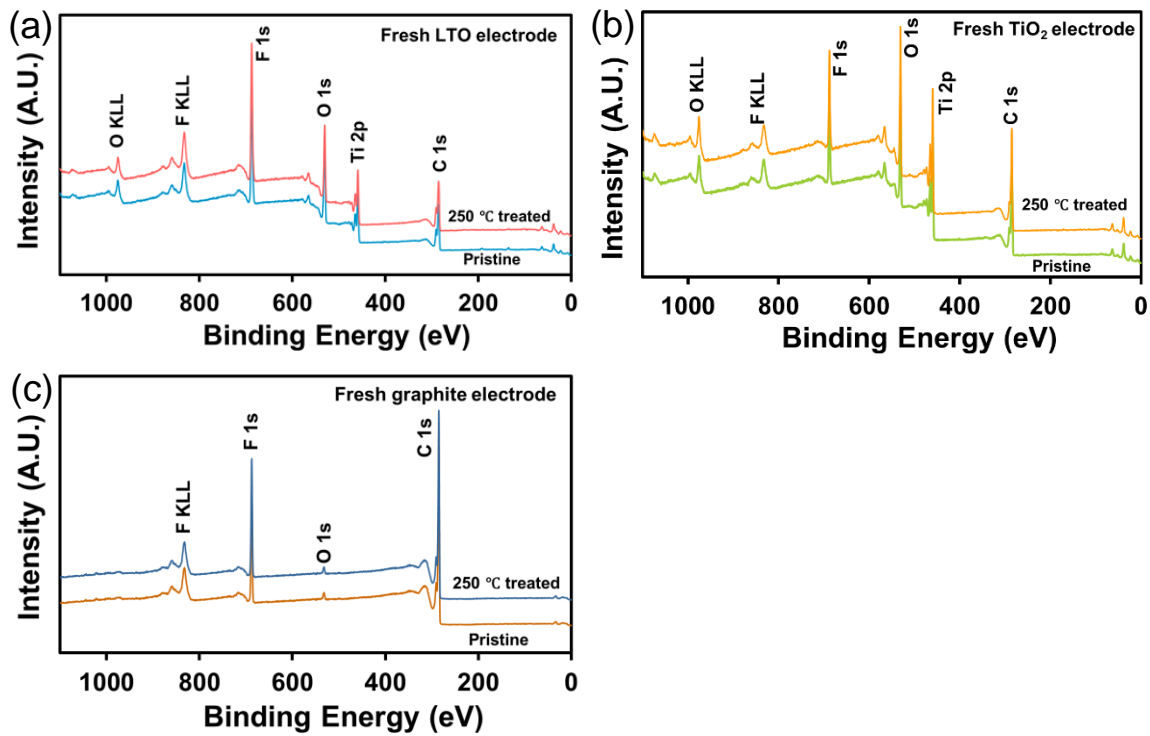

**Figure S6.** XPS survey spectra of fresh electrodes: (a) LTO, (b)  $\text{TiO}_2$ , and (c) graphite.

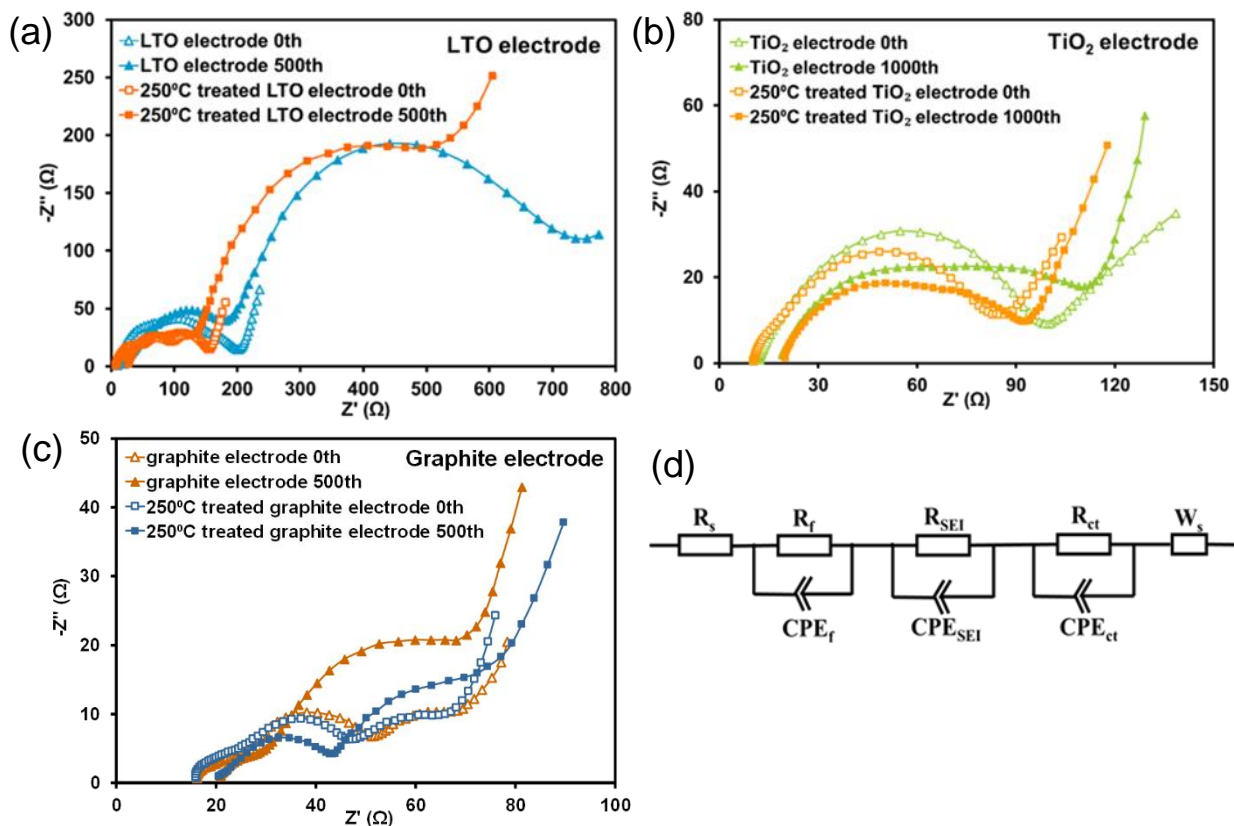

**Figure S7.** Nyquist plots of (a) LTO, (b)  $\text{TiO}_2$ , and (c) graphite electrodes tested at a 1 C rate with a potential range of 0.1 V – 3.0 V at 0<sup>th</sup> (after the formation at a 0.1 C rate for 3 cycles) and after long-term cycling. (d) Equivalent circuit.

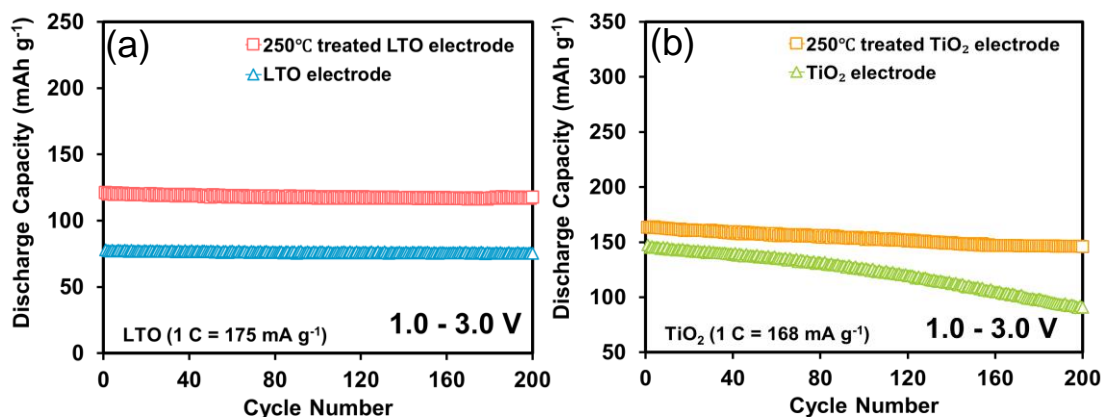

**Figure S8.** Cycling performance of (a) LTO and (b)  $\text{TiO}_2$  with and without  $250^\circ\text{C}$  treatment within a potential range of 1.0 – 3.0 V.

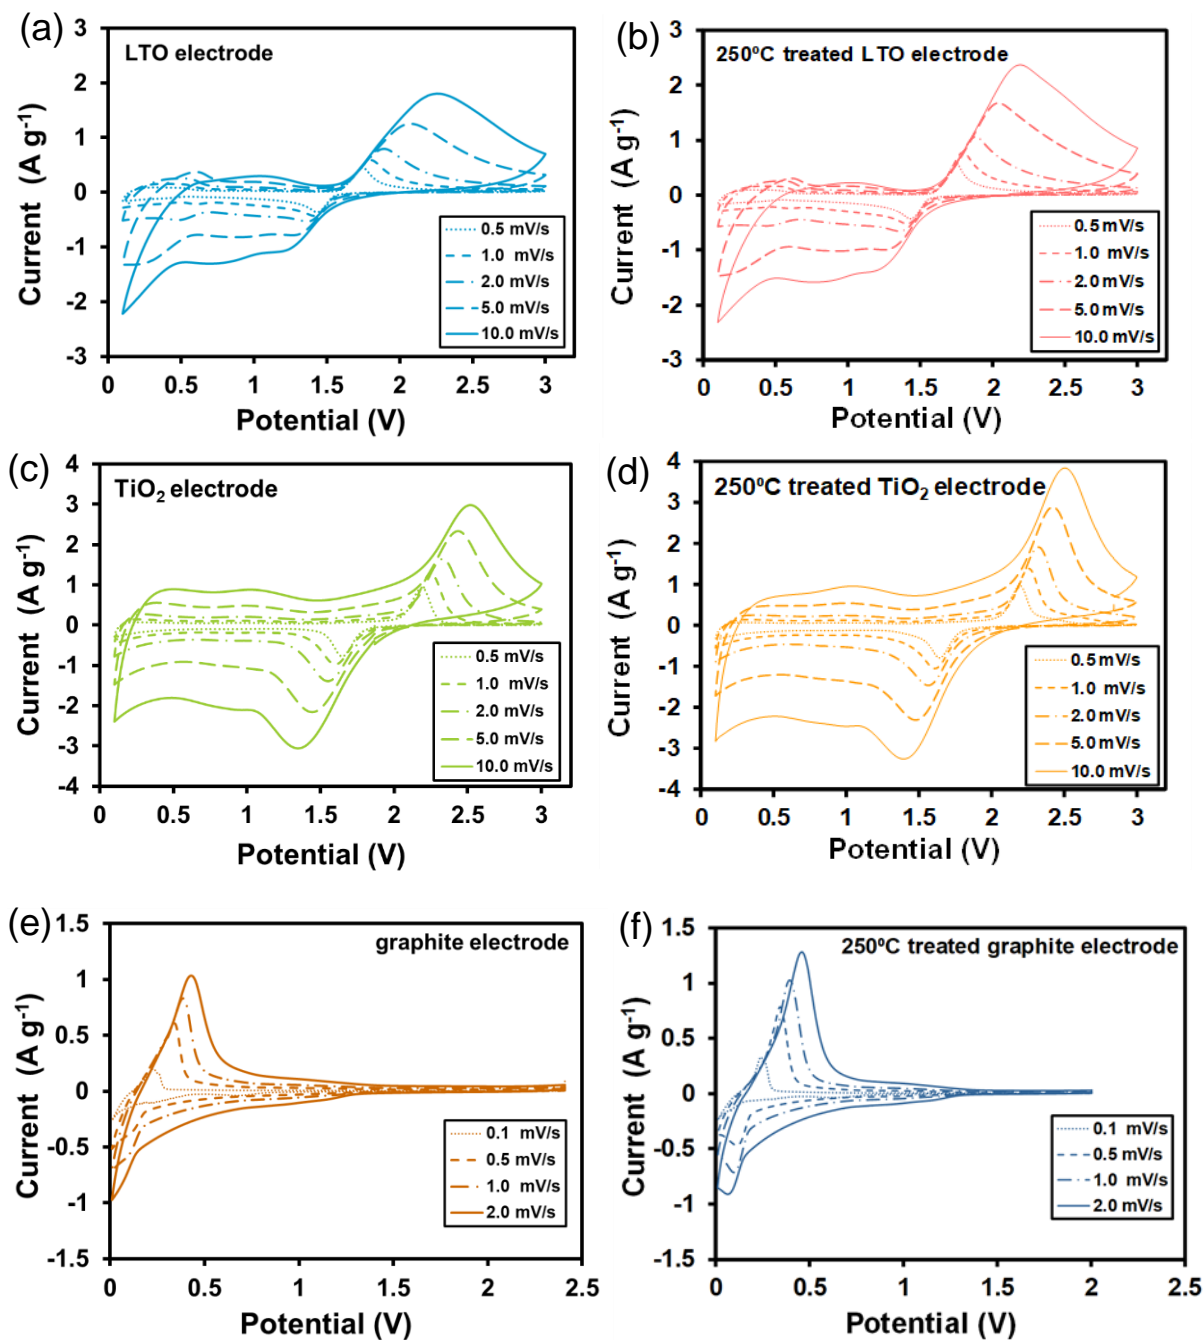

**Figure S9.** CV curves of (a) pristine LTO, (b) 250 °C treated LTO, (c) pristine  $\text{TiO}_2$ , and (d) 250 °C treated  $\text{TiO}_2$  electrodes at different scan rates of 0.5, 1.0, 2.0, 5.0, and 10.0  $\text{mV s}^{-1}$ . CV curves of (e) pristine graphite and (f) 250 °C treated graphite electrodes at different scan rates of 0.1, 0.5, 1.0, and 2.0  $\text{mV s}^{-1}$ .

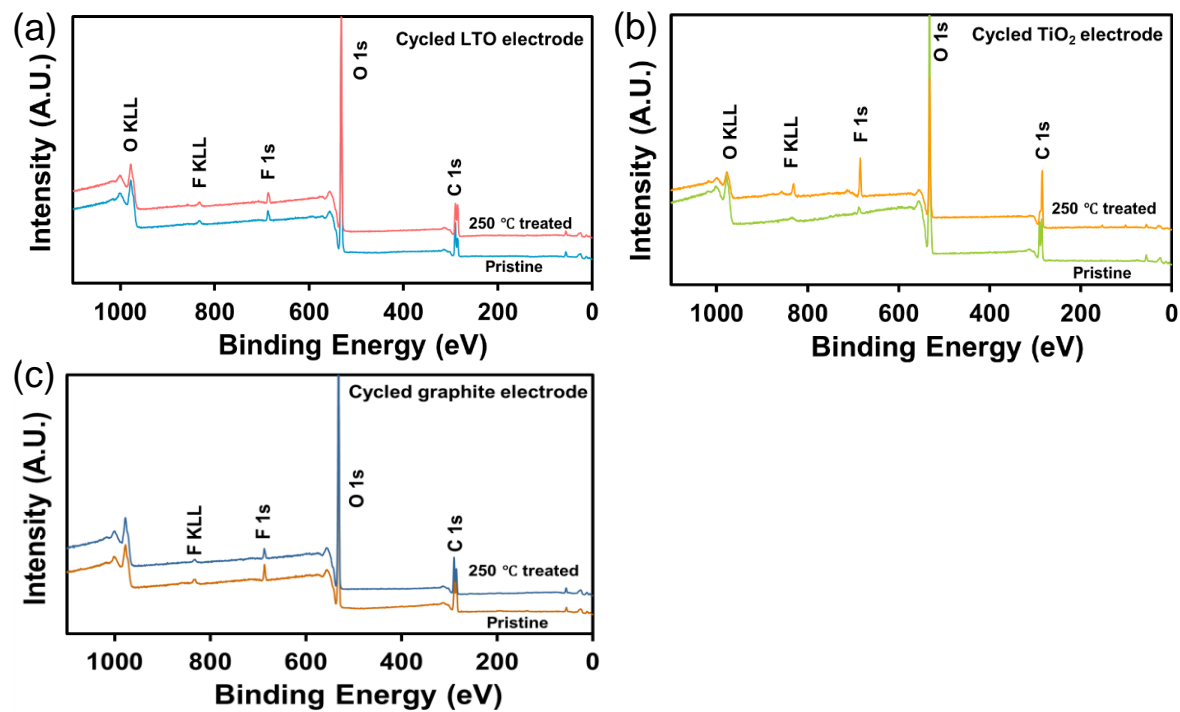

**Figure S10.** XPS survey spectra of electrodes: (a) LTO after 500 cycles of charge/discharge, (b)  $\text{TiO}_2$  after 1,000 cycles of charge/discharge, and (c) graphite after 500 cycles of charge/discharge.

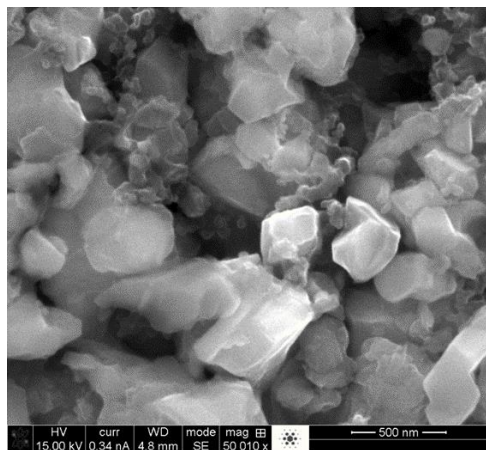

**Figure S11.** SEM image of fresh LTO electrode without 250 °C treatment.

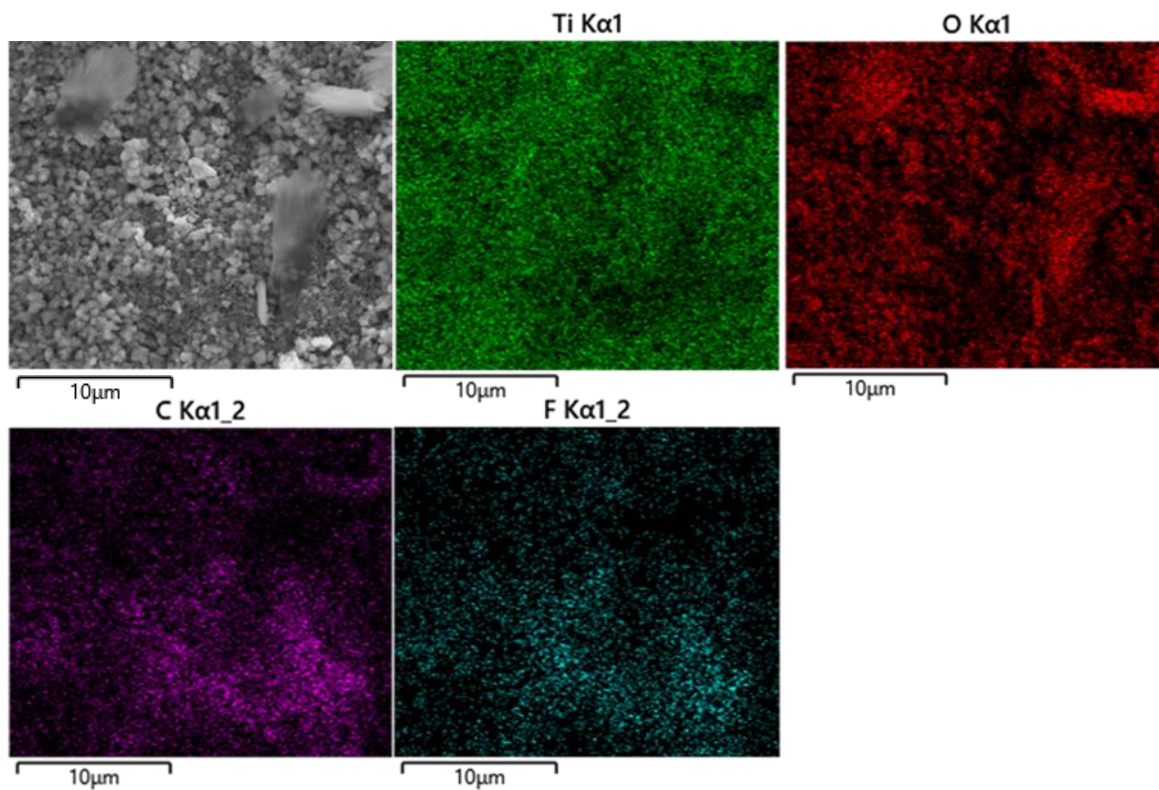

**Figure S12.** SEM image and EDS mapping of pristine LTO electrode after 500 cycles of charge/discharge.

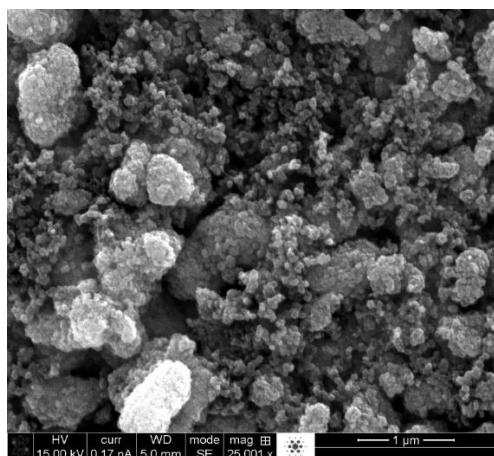

**Figure S13.** SEM image of fresh TiO<sub>2</sub> electrode with 250 °C treatment.



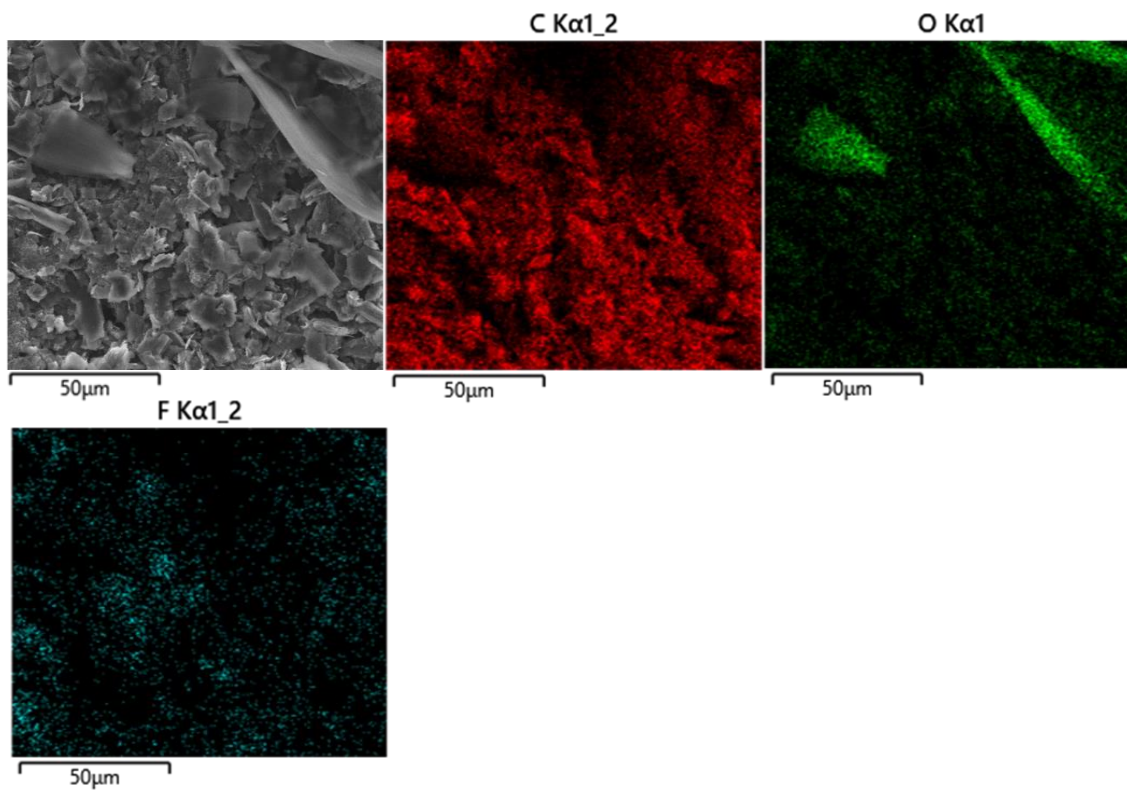

**Figure S14.** SEM image and EDS mapping of pristine graphite electrode after 500 cycles of charge/discharge.

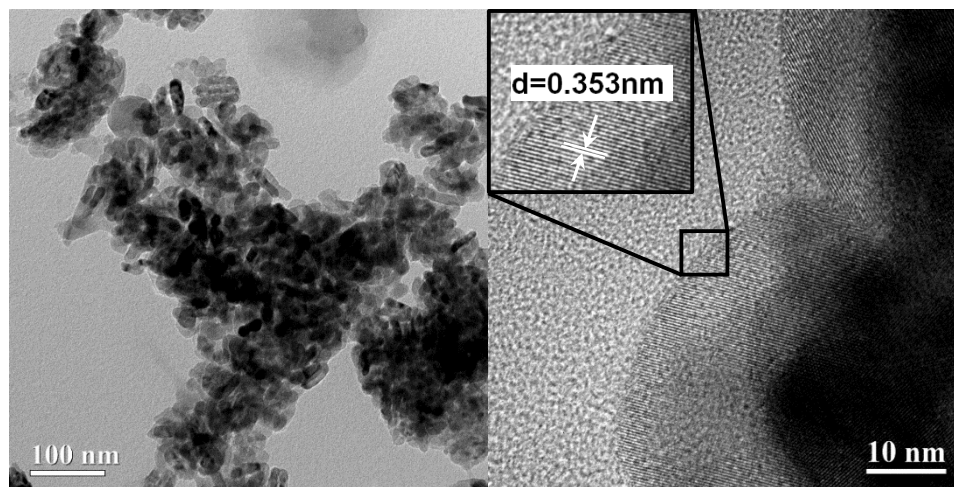

**Figure S15.** TEM images of pure  $\text{TiO}_2$  nanoparticles.
